1  
2  
3  
4  
5  
6  
7  
8  
9  
10  
11  
12  
13  
14  
15  
16  
17  
18  
19

**The complete genome sequence of the *Staphylococcus* bacteriophage Metroid**

Adele Crane<sup>1,2</sup>, Joy Abaidoo<sup>1</sup>, Gabriella Beltran<sup>1</sup>, Danielle Fry<sup>1</sup>, Colleen Furey<sup>1</sup>, Noe Green<sup>1</sup>, Ravneet Johal<sup>1</sup>, Bruno La Rosa<sup>1</sup>, Catalina Lopez Jimenez<sup>1</sup>, Linh Luong<sup>1</sup>, Garrett Maag<sup>1</sup>, Jade Porche<sup>1</sup>, Lauren Reyes<sup>1</sup>, Aspen Robinson<sup>1</sup>, Samantha Sabbara<sup>1</sup>, Lucia Soto Herrera<sup>1</sup>, Angelica Urquidez Negrete<sup>1</sup>, Pauline Wilson<sup>1</sup>, Kerry Geiler-Samerotte<sup>1,3,#</sup>, and Susanne P. Pfeifer<sup>1-3,#,\*</sup>

<sup>1</sup> School of Life Sciences, Arizona State University, Tempe, USA  
<sup>2</sup> Center for Evolution and Medicine, Arizona State University, Tempe, USA  
<sup>3</sup> Center for Mechanisms of Evolution, Arizona State University, Tempe, USA  
# These authors jointly supervised the project

\* corresponding author: Susanne P. Pfeifer, [susanne.pfeifer@asu.edu](mailto:susanne.pfeifer@asu.edu)

20 **Abstract**

21           Phages infecting bacteria of the genus *Staphylococcus* play an important role in their host's  
22 ecology and evolution. On one hand, horizontal gene transfer from phage can encourage the rapid  
23 adaptation of pathogenic *Staphylococcus* enabling them to escape host immunity or access novel  
24 environments. On the other hand, lytic phages are promising agents for the treatment of bacterial  
25 infections, especially those resistant to antibiotics. As part of an ongoing effort to gain novel insights into  
26 bacteriophage diversity, we characterized the complete genome of the *Staphylococcus* bacteriophage  
27 Metroid, a cluster C phage with a genome size of 151kb, encompassing 254 predicted protein-coding  
28 genes as well as 4 tRNAs. A comparative genomic analysis highlights strong similarities – including a  
29 conservation of the lysis cassette – with other *Staphylococcus* cluster C1 bacteriophages, several of which  
30 were previously characterized for therapeutic applications.

31

32 key words: bacteriophage; *Staphylococcus*; *Myoviridae*; genome assembly

### 33 **Introduction**

34 Pathogens of the genus *Staphylococcus*, known for their ability to evade the human immune  
35 system, are an important public health concern causing a multitude of community-acquired infections  
36 ranging from food poisoning to skin lesions and life-threatening sepsis (Pollitt et al. 2018). As  
37 *Staphylococcus* largely reproduces clonally, much of the genetic diversity among strains stems from  
38 horizontal gene transfer through bacteriophages. Thereby, the acquisition of novel genes may not only aid  
39 adaptation of a bacterial strain to novel environments (Xia and Wolz 2014), but it can also increase  
40 pathogenicity. Bacteriophages play an important role in bacterial pathogenesis (Deghorain et al. 2012) as  
41 they encode for many known staphylococcal virulence factors (including the immune-modulator  
42 staphylokinase, as well as exfoliative Panton-Valentine leukocidin toxins; see review by Malachowa and  
43 DeLeo 2010). Moreover, bacteriophages can mediate the mobilization and transfer of genomic  
44 pathogenicity islands (Xia and Wolz 2014). On the other hand, virulent bacteriophages, which lyse their  
45 host cell after successful reproduction, also represent promising new avenues for the treatment of  
46 antibiotic-resistant *Staphylococcus* infections through phage therapy (Moller et al. 2019).

47  
48 Approximately  $10^{30}$  bacteriophages are estimated to exist on our planet (Rohwer 2003), however  
49 much of their diversity remains under-sampled and therefore uncharacterized. Several *Staphylococcus*  
50 phages (order: *Caudovirales*; *i.e.*, tailed dsDNA phages) have been isolated and sequenced (*e.g.*, Kwan et  
51 al. 2005; Deghorain et al. 2012; Olivera et al. 2019). Historically, *Staphylococcus* phages were grouped  
52 according to their lytic activity and serology; specifically, their reaction to (amongst others) polyclonal  
53 antiserum (Rountree 1949; Rippon 1952, 1956). In contrast, modern phage classification systems are  
54 based on either: 1) morphology (determined using transmission electron microscopy), categorizing  
55 *Myoviridae* (long, contractile tail; group A), *Siphoviridae* (long, non-contractile tail; group B), and  
56 *Podoviridae* (short tail; group C) (Ackermann 1975; Brandis and Lenz 1984); or 2) genome size,  
57 categorizing class I (<20kb), class II (~40kb), and class III (>125kb) (Kwan et al. 2005), with phages of  
58 like category generally being more closely related to one another (Kwan et al. 2005). More recently, in

59 one of the largest *Staphylococcus* phage genomic studies published to date, Olivera et al. (2019)  
60 developed a comparative evolutionary approach to group *Staphylococcus* phages according to their gene  
61 content: cluster A (morphologically *Podoviridae*; genome size: 16-18kb), cluster B (a diverse cluster  
62 consisting of mostly temperate phages; genome size: 39-48kb), cluster C (morphologically *Myoviridae*;  
63 genome size: 127-152kb), and cluster D (morphologically *Siphoviridae*; genome size: 89-93kb). Based on  
64 predicted sequence similarities of protein families (phams), the authors further subdivided *Staphylococcus*  
65 phages into 27 subclusters (A1-A2, B1-B17, C1-C6, and D1-D2), members of which exhibit similar  
66 morphology and genomic features (*i.e.*, genome size, GC-content, and number of genes; Olivera et al.  
67 2019). In contrast to the usually temperate *Siphoviridae*, most *Myoviridae* and *Podoviridae*  
68 experimentally characterized to date exhibit a lytic life cycle. Lytic phages destroy their host cells,  
69 making them interesting candidates for phage therapy (Xia and Wolz 2014).

70

71 Here, we report the complete genome sequence of the *Staphylococcus* bacteriophage Metroid, a  
72 *Myoviridae* sequenced as part of HHMI's SEA-PHAGES program – an ongoing effort to systematically  
73 characterize bacteriophages and their relationship to their (often pathogenic) bacterial hosts. A  
74 comparative genomic analysis highlights strong similarities with other *Staphylococcus* cluster C1  
75 bacteriophages, several of which were previously characterized for therapeutic applications  
76 (Vandersteegen et al. 2011; Gill 2014; Leskinen et al. 2017; Ajuebor et al. 2018; Philipson et al. 2018).

77

78

79

## 80 **Materials and Methods**

81 Sample collection, isolation, purification, amplification, and phage characterization followed the  
82 HHMI SEA-PHAGES Phage Discovery Guide  
83 (<https://seaphagesphagediscoveryguide.helpdocsonline.com/home>; last accessed 2020/04/30), with  
84 modifications indicated below. Library preparation, sequencing, assembly, and gene annotation followed

85 the HHMI SEA-PHAGES Phage Genomics Guide

86 (<https://seaphagesbioinformatics.helpdocsonline.com/home>; last accessed 2020/04/30).

87

88

89 Sample Collection and Isolation:

90 To locate phage, ~50 soil samples were collected from various locations in Arizona and plaque  
91 assays were performed on the sample filtrates. Most samples did not produce phage that could infect  
92 *Staphylococcus* spp. The sample that produced Metroid was collected from a shaded and well-irrigated  
93 garden on Arizona State University's Tempe campus (33.417708N, 111.935974W; ambient temperature  
94 37.7°C). The soil was loosely packed into half of a 15 mL conical tube and stored at 4°C until phage  
95 isolation and a plaque assay were performed. In order to isolate bacteriophages, the sample was  
96 submerged in 10 mL PYCa liquid media (yeast, tryptone, 1M CaCl<sub>2</sub>, 40% dextrose, cycloheximide),  
97 vortexed for one minute, and placed in a shaking incubator at room temperature for 30 minutes. This  
98 sample was then centrifuged at 4500 rpm for four minutes and filter-sterilized with a 0.22 µm syringe  
99 filter. A 250 µL sample of this filtrate was mixed with 250 µL of host bacteria of the genus  
100 *Staphylococcus*, which had been grown to saturation in PYCa and stored at 4°C. After a ten minute  
101 incubation at room temperature, the 500 µL of phage plus bacteria was added to 4.5 mL molten PYCa top  
102 agar (60°C) and immediately plated on a PYCa agar plate which was incubated for 48 hr at 37°C.

103

104

105 Purification and Amplification:

106 Smooth plaques appeared on the PYCa plates after 48 hours and were ~3 mm in diameter. One  
107 plaque was picked with a sterile pipette tip, and phage were resuspended in phage buffer (1M Tris, 1M  
108 MgSO<sub>4</sub>, NaCl, ddH<sub>2</sub>O, 100 mM CaCl<sub>2</sub>), and a series of six 10-fold serial dilutions were performed. Each  
109 dilution was inoculated with 250 µL of *Staphylococcus* spp. host bacteria and incubated at room

110 temperature for ten minutes. Each dilution was plated with 4.5 mL PYCa top agar and incubated at 37°C  
111 for 48 hours. A plaque from the plate representing the  $10^{-2}$  dilution was selected to complete two  
112 additional rounds of purification through subsequent dilutions and plaque assays. For each purification,  
113 we chose to pick plaques from a ‘countable’ plate, on which plaques were separated enough to suggest  
114 that each grew from a single phage particle (typically a countable plate had 30 to 300 plaques).

115         Once purified, we amplified the phage to obtain a titer greater than  $1 \times 10^9$  PFU/mL which would  
116 provide enough DNA for genome sequencing. A plate containing numerous purified phage plaques was  
117 flooded with 8 mL of phage buffer and set at room temperature for an hour to yield a phage lysate. The  
118 lysate was collected in a 15 mL tube and centrifuged at 8000 rpm for four minutes then filtered through a  
119 3 mL syringe with a 0.22  $\mu$ L filter. 10-fold serial dilutions were made with the collected lysate for  
120 amplification. A spot titer was made with the undiluted lysate as well as  $10^{-1}$  to  $10^{-10}$  lysate dilutions.  
121 Based on counting the number of plaques formed by each lysate in the spot titer assay, the  $10^{-8}$  dilution  
122 was selected as the best candidate to produce a countable plate. A full titer plate was prepared with the  
123  $10^{-7}$ ,  $10^{-8}$ , and  $10^{-9}$  dilutions. The titer calculated from the full titer assay was  $2.65 \times 10^{10}$  PFU/mL.

124

#### 125 Phage Characterization:

126 *DNA Extraction:* DNA extraction was performed on the phage lysate using the Wizard DNA Clean-Up  
127 kit (Promega) with minor modifications. 5  $\mu$ L of nuclease mix (NaCl, ddH<sub>2</sub>O, DNase 1, RNase A,  
128 glycerol) was added to 1  $\mu$ L of lysate and mixed by inversion. The solution was incubated at 37°C for ten  
129 minutes. 15  $\mu$ L of EDTA and 1  $\mu$ L of Proteinase K were added to the solution and incubated at 37°C for  
130 20 minutes. 2 mL of Wizard DNA Clean-Up resin (Promega) was added to the solution and mixed by  
131 inversion for two minutes. The solution was syringed-filtered through two Wizard Genomic DNA  
132 columns (Promega) and then washed three times with 80% isopropanol. The columns were twice spun in  
133 a centrifuge at top speed for two minutes and then placed in a 90°C heat block for one minute. 50  $\mu$ L of

134 ddH<sub>2</sub>O was used for elution. Final elutes were combined for 100 µL of total DNA extract. A Nanodrop  
135 ND 1000 was used to determine a DNA concentration of 114.9 ng/µL.

136

137 *Transmission Electron Microscopy:* A high-titer lysate was made up for Transmission Electron  
138 Microscopy (TEM) by spinning 100 µL of phage lysate in a 4°C centrifuge at top speed for 22 minutes.  
139 The supernatant was removed and the pellet was resuspended in 10 µL of phage buffer. The high-titer  
140 lysate then underwent TEM preparation by negatively staining the virus particles. Specifically, isolated  
141 particles were adhered to a 300-mesh carbon-formvar grid for one minute, followed by staining with 1%  
142 aqueous uranyl acetate for 30 seconds. Images were acquired using a Philips CM12 TEM operated at  
143 80kV and equipped with a Gatan model 791 CCD camera.

144

145

#### 146 Library Preparation, Sequencing, and *De Novo* Assembly

147 A sequencing library was prepared from genomic DNA by using an NEB Ultra II FS kit with  
148 dual-indexed barcoding and sequenced on an Illumina MiSeq, yielding a total of 901,246 single-end  
149 150bp reads (>895X coverage). Quality control checks using FastQC v.0.11.7  
150 (<http://www.bioinformatics.babraham.ac.uk/projects/fastqc>; last accessed 2020/04/30) indicated that the  
151 data was of high quality, rendering additional read processing prior to assembly unnecessary. Following  
152 Russell (2018), reads were *de novo* assembled using Newbler v2.9, resulting in a single linear contig of  
153 size 150,935bp, which was checked for completeness, accuracy, and phage genomic termini using Consed  
154 v.29. All software was executed using default settings.

155

156

157

158

159 Genome Annotation

160 Annotation was performed using DNA Master v.5.23.3 (<http://cobamide2.bio.pitt.edu>; last  
161 accessed 2020/04/30). Putative protein-encoding open reading frames (genes) were identified using  
162 Glimmer v.3.0 (Delcher et al. 1999) and GeneMark v.2.5 (Lukashin and Borodovsky 1998) with AUG  
163 (methionine), UUG and CUG (leucine), GUG (valine), and AUA (isoleucine) as start codons. Using  
164 annotated bacteriophage sequences from public databases, functional assignments were made with Blastp  
165 v.2.9 (Altschul et al. 1990), NCBI's Conserved Domain Database (Marchler-Bauer et al. 2015), and  
166 HHPred (Söding et al. 2005). In addition, TMHMM2 (<http://www.cbs.dtu.dk/services/TMHMM/>; last  
167 accessed 2020/04/30) and SOSUI ([http://harrier.nagahama-i-bio.ac.jp/sosui/sosui\\_submit.html](http://harrier.nagahama-i-bio.ac.jp/sosui/sosui_submit.html); last  
168 accessed 2020/04/30) were used to identify membrane proteins. tRNAs were annotated using Aragon  
169 v.1.1 (included in DNA Master) and v.1.2.38 (<http://130.235.244.92/ARAGORN/>; last accessed  
170 2020/04/30) as well as tRNAscan-SE v.2.0 (<http://trna.ucsc.edu/tRNAscan-SE/>; last accessed  
171 2020/04/30). All software was executed using default settings.

172

173 Comparative genomics analysis

174 Due to their similar length, number of genes and tRNAs, as well as GC-content, the genomes of the  
175 phages IME-SA1, IME-SA2, ISP (Vandersteegen et al. 2011), JA1 (Ajuebor et al. 2018), K (Gill 2014),  
176 vB\_SauM\_0414\_108 (Philipson et al. 2018), and vB\_SauM-fRuSau02 (Leskinen et al. 2017) were  
177 downloaded from GenBank (Table 1) to create a database of *Staphylococcus* cluster C1 phages (Olivera  
178 et al. 2019) using PhamDB (<https://github.com/jglamine/phamdb/wiki/Using-PhamDB>; last accessed  
179 2020/04/30). This custom database was used for all subsequent comparative analyses. First, a multiple  
180 sequence alignment was performed utilizing Kalign v.1.04 (Lassmann and Sonnhammer 2005) to produce  
181 a neighbor-joining tree. Second, dotplots, comparing the relatedness of different nucleotide sequences,  
182 were generated in 10bp sliding windows using Gepard v.1.40 (Krumstiek et al. 2007). Lastly, the database  
183 was loaded into Phamerator (<https://github.com/scresawn/Phamerator>; last accessed 2020/04/30) to  
184 visually compare phage genomes.



| name             | length  | # genes | # tRNAs | GC-content | host             | GenBank accession number | reference                 |
|------------------|---------|---------|---------|------------|------------------|--------------------------|---------------------------|
| IME-SA1          | 140,218 | 209     | 4       | 30.33      | <i>S. aureus</i> | KP687431.1               | unpublished               |
| IME-SA2          | 140,906 | 212     | 4       | 30.33      | <i>S. aureus</i> | KP687432.1               | unpublished               |
| ISP              | 138,339 | 215     | 4       | 30.42      | <i>S. aureus</i> | FR852584.1               | Vandersteegen et al. 2011 |
| JA1              | 147,135 | 233     | 4       | 30.25      | <i>S. aureus</i> | MF405094.1               | Ajuebor et al. 2018       |
| K                | 148,317 | 233     | 4       | 30.39      | <i>S. aureus</i> | NC_005880.2              | Gill 2014                 |
| vB_SauM_0414_108 | 151,627 | 249     | 4       | 30.39      | <i>S. aureus</i> | MH107769.1               | Philipson et al. 2018     |
| vB_SauM-fRuSau02 | 148,464 | 236     | 4       | 30.22      | <i>S. aureus</i> | MF398190.1               | Leskinen et al. 2017      |

185

186 **Table 1: Features of the seven *Staphylococcus* cluster C1 phages used for comparative genome**  
187 **analyses.**

188

189

## 190 **Results and Discussion**

191 The complete genome sequence of the *Staphylococcus* bacteriophage Metroid was sequenced and  
192 annotated (see "Materials and Methods" for details). The *Myoviridae* morphology (*i.e.*, an icosahedral  
193 capsid [diameter: 100nm] enclosing the double-stranded DNA attached to a long, contractile tail [length:  
194 108nm]; Figure 1a) as well as the genome size of 151kb (including the ~10kb terminal repeat) suggests  
195 that Metroid belongs to the *Staphylococcus* phage cluster C. Metroid's genome has a GC-content of  
196 30.40%, similar to those of previously published *Staphylococcus* phages (27.98-34.96%) (Kwan et al.  
197 2005; Deghorain et al. 2012; Olivera et al. 2019). The tightly-packed genome contains 254 predicted  
198 protein-coding genes as well as 4 tRNAs, most of which are transcribed on the forward strand (Figure  
199 1b). This corresponds to a gene density of 1.68 genes/kb – on the upper end of the range previously  
200 reported for cluster C phages (164-249 genes; 0-5 tRNAs; 1.25-1.64 genes/kb) (Olivera et al. 2019).  
201 Although the overall gene coding potential of Metroid is 89.42%, only 26 of the 254 predicted proteins  
202 could be assigned a putative function. The majority of predicted proteins are either conserved but of no  
203 known function (170 out of 254), membrane proteins (22), or unique (*i.e.*, without a match to any of the

204 queried databases; 1). Thereby, functionally related genes are organized into distinct modules (*e.g.*,  
205 distinct head and tail modules connected by a head-to-tail adapter) (Figure 1b).

206

207 Comparative genomic analysis with seven *Staphylococcus* subcluster C1 phages indicates that  
208 Metroid is most closely related to vB\_SauM\_0414\_108 (Figure 1c,d) – a phage discovered as part of a  
209 recent effort proposing a guideline and standardized workflow to submit phages to the Federal Drug  
210 Administration to be considered as potential future treatments of bacterial infections (Philipson et al.  
211 2018). More generally, genes in the lysis cassettes show a strong conservation between Metroid and the  
212 closely-related *Staphylococcus* cluster C phages, previously characterized for therapeutic research (Figure  
213 1e), suggesting that Metroid might be a suitable candidate for future phage therapies.

214

215

#### 216 **Data availability**

217 Metroid's genome assembly is available in GenBank under accession number XXXXXX.

218

219

#### 220 **Acknowledgements**

221 This study was supported by the Howard Hughes Medical Institute SEA-PHAGES program and  
222 Arizona State University's School of Life Sciences. DNA concentration was determined in the Arizona  
223 State University DNA Shared Resource Facility. Library preparation and sequencing was performed at  
224 the University of Pittsburgh. Computations were partially performed at Arizona State University's High  
225 Performance Computing facility. We are grateful to David Lowry for transmission electron microscopy  
226 imaging, Billy Biederman, Graham Hatfull, Deborah Jacobs-Sera, Welkin Pope, Daniel Russell, and Vic  
227 Sivanathan for library preparation, sequencing, and assembly as well as providing faculty training for the  
228 SEA-PHAGES program.

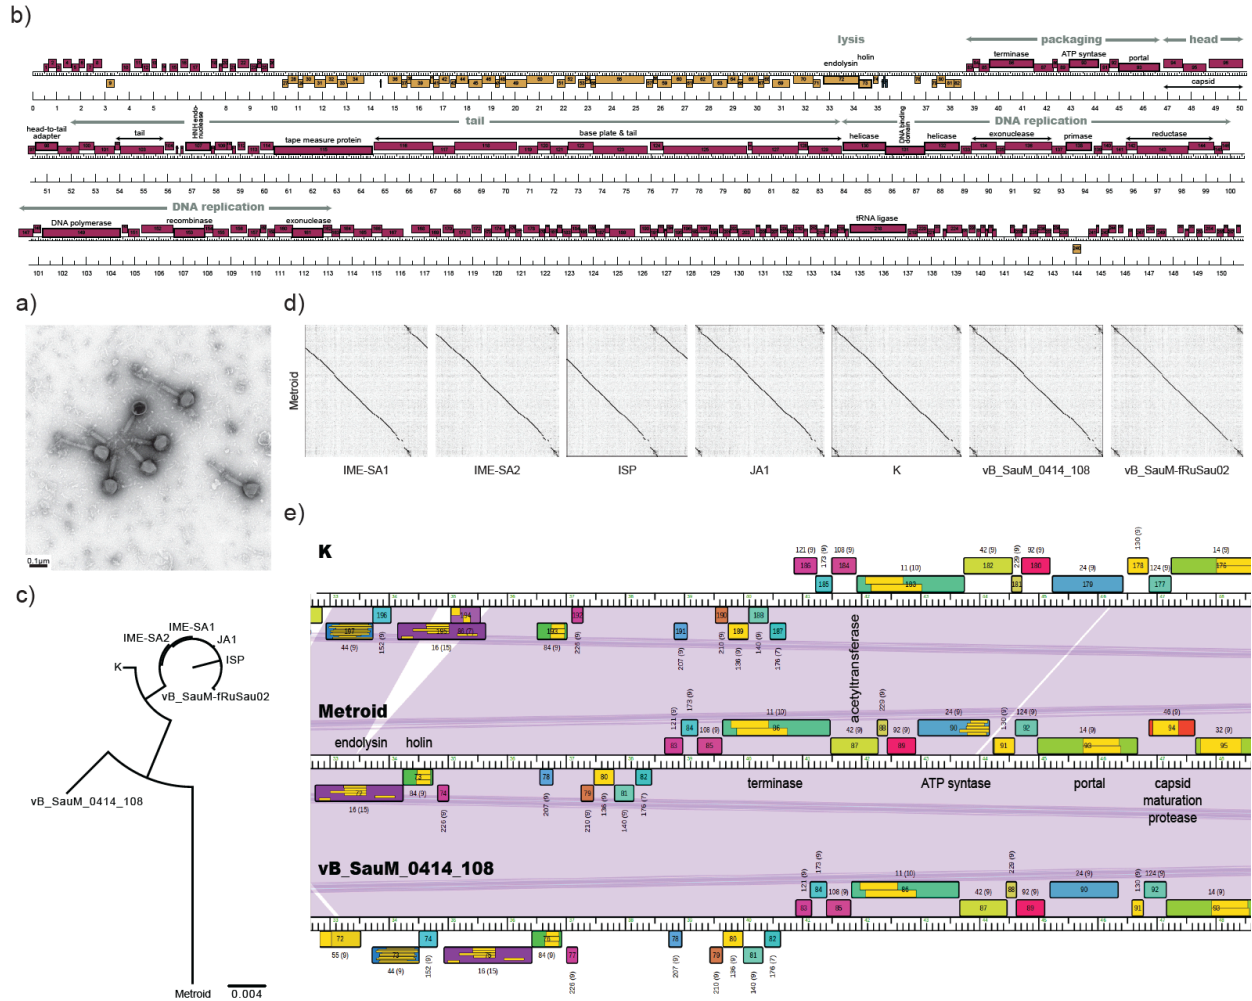

229

230 **Figure 1: Characterization of Metroid and its relatedness to other *Staphylococcus* cluster C1**  
 231 **phages.** a) Transmission electron microscopy image showing Metroid's morphology. b) Metroid's  
 232 genome contains 254 predicted protein-coding genes as well as 4 tRNAs; total genome size: 151kb  
 233 including the ~10kb terminal repeat. The majority of genes are transcribed on the forward strand as  
 234 shown in pink; genes transcribed on the reverse strand are highlighted in orange; tRNAs in blue.  
 235 Functionally related genes are organized into distinct modules (highlighted in grey). c) Neighbor-joining  
 236 tree and d) dotplot of Metroid and seven previously described *Staphylococcus* bacteriophages (Table 1).  
 237 e) Genes in the lysis cassettes as well as in the packaging module show a strong conservation between  
 238 Metroid and two closely-related *Staphylococcus* phages, K (Gill 2014) and vB\_SauM\_0414\_108  
 239 (Philipson et al. 2018). Genes are labelled with their putative function, with genes belonging to the same  
 240 protein family (pham) depicted in the same color. Purple coloring between genomes highlights regions of  
 241 high nucleotide similarity (i.e., a BLAST e-value of 0).

## 242 References

- 243 Ackermann HW. 1975. Classification of the bacteriophages of gram-positive cocci: *Micrococcus*,  
244 *Staphylococcus*, and *Streptococcus*. *Pathol. Biol.*, 23: 247–253.
- 245 Ajuebor J, et al. 2018. Comparison of *Staphylococcus* phage K with close phage relatives commonly  
246 employed in phage therapeutics. *Antibiotics (Basel)* 7(2): E37.
- 247 Altschul SF, Gish W, Miller W, Myers EW, Lipman DJ. 1990. Basic local alignment search tool. *J. Mol.*  
248 *Biol.*, 215(3): 403–410.
- 249 Brandis H, Lenz W. 1984. Staphylokokken-Bakteriophagen. In: Meyer, W. (Ed.), Staphylokokken und  
250 Staphylokokken-Erkrankungen. VEB Gustav Fischer Verlag, Jena, pp. 186–214.
- 251 Deghorain M, et al. 2012. Characterization of novel phages isolated in coagulase-negative staphylococci  
252 reveals evolutionary relationships with *Staphylococcus aureus* phages. *J Bacteriol.*, 194(21): 5829–  
253 5839.
- 254 Delcher AL, Harmon D, Kasif S, White O, Salzberg SL. 1999. Improved microbial gene identification  
255 with GLIMMER. *Nucleic Acids Res.*, 27(23): 4636–4641.
- 256 Gill JJ. 2014. Revised genome sequence of *Staphylococcus aureus* bacteriophage K. *Genome Announc.*  
257 2(1): e01173-13.
- 258 Krumsiek J, Arnold R, Rattei T. 2007. Gepard: a rapid and sensitive tool for creating dotplots on genome  
259 scale. *Bioinformatics*, 23(8): 1026–1028.
- 260 Kwan T, Liu J, DuBow M, Gros P, Pelletier J. 2005. The complete genomes and proteomes of 27  
261 *Staphylococcus aureus* bacteriophages. *Proc. Natl. Acad. Sci. USA* 102: 5174–5179.
- 262 Lassmann T, Sonnhammer EL. 2005. Kalign – an accurate and fast multiple sequence alignment  
263 algorithm. *BMC Bioinformatics* 12(6): 298.
- 264 Leskinen K, et al. 2017. Characterization of vB\_SauM-fRuSau02, a Twort-like bacteriophage isolated  
265 from a therapeutic phage cocktail. *Viruses* 9(9): E258.
- 266 Lukashin AV, Borodovsky M. 1998. GeneMark.hmm: new solutions for gene finding. *Nucleic Acids*  
267 *Res.*, 26(4): 1107–1115.
- 268 Malachowa N, DeLeo FR. 2010. Mobile genetic elements of *Staphylococcus aureus*. *Cellular and*  
269 *Molecular Life Sciences*, 67(18): 3057–3071.
- 270 Marchler-Bauer A, et al. 2015. CDD: NCBI's conserved domain database. *Nucleic Acids Res.*, 43,  
271 Database issue: D222–226.
- 272 Moller AG, Lindsay JA, Read TD. 2019. Determinants of phage host range in *Staphylococcus*  
273 species. *Appl. Environ. Microbiol.*, 85(11).
- 274 Oliveira H, et al. 2019. Staphylococci phages display vast genomic diversity and evolutionary  
275 relationships. *BMC Genomics*, 20(1): 357.
- 276 Philipson CW, et al. 2018. Characterizing phage genomes for therapeutic applications. *Viruses* 10(4):  
277 E188.
- 278 Pollitt EJG, Szkuta PT, Burns N, Foster SJ. 2018. *Staphylococcus aureus* infection dynamics. *PLoS*  
279 *Pathog.*, 14(6): e1007112.
- 280 Rippon JE. 1952. A new serological division of *Staphylococcus aureus* bacteriophages: group G. *Nature*  
281 170(4320): 287.
- 282 Rippon JE. 1956. The classification of bacteriophages lysing staphylococci. *J. Hyg. (Lond.)* 54: 213–226.
- 283 Rohwer F. 2003. Global phage diversity. *Cell*, 113(2): 141.
- 284 Rountree PM. 1949. The serological differentiation of staphylococcal bacteriophages. *J. Gen. Microbiol.*  
285 3:164–173.
- 286 Russell DA. 2018. Sequencing, assembling, and finishing complete bacteriophage genomes. *Methods*  
287 *Mol. Biol.*, 1681:109–125.
- 288 Söding J, Biegert A, Lupas AN. 2005. The HHpred interactive server for protein homology detection and  
289 structure prediction. *Nucleic Acids Res.*, 33, Web Server issue: W244–248.
- 290 Vandersteegen K, et al. 2011. Microbiological and molecular assessment of bacteriophage ISP for the  
291 control of *Staphylococcus aureus*. *PLoS ONE* 6(9): e24418.

292 Xia G, Wolz C. 2014. Phages of *Staphylococcus aureus* and their impact on host evolution. *Infect. Genet.*  
293 *Evol.*, 21: 593–601.
